# Supplementary material
Source: PubMed Central journal article supplement (PMC3930310)
Supplement: ismej2013167x1.pdf [file ismej2013167x1.pdf]

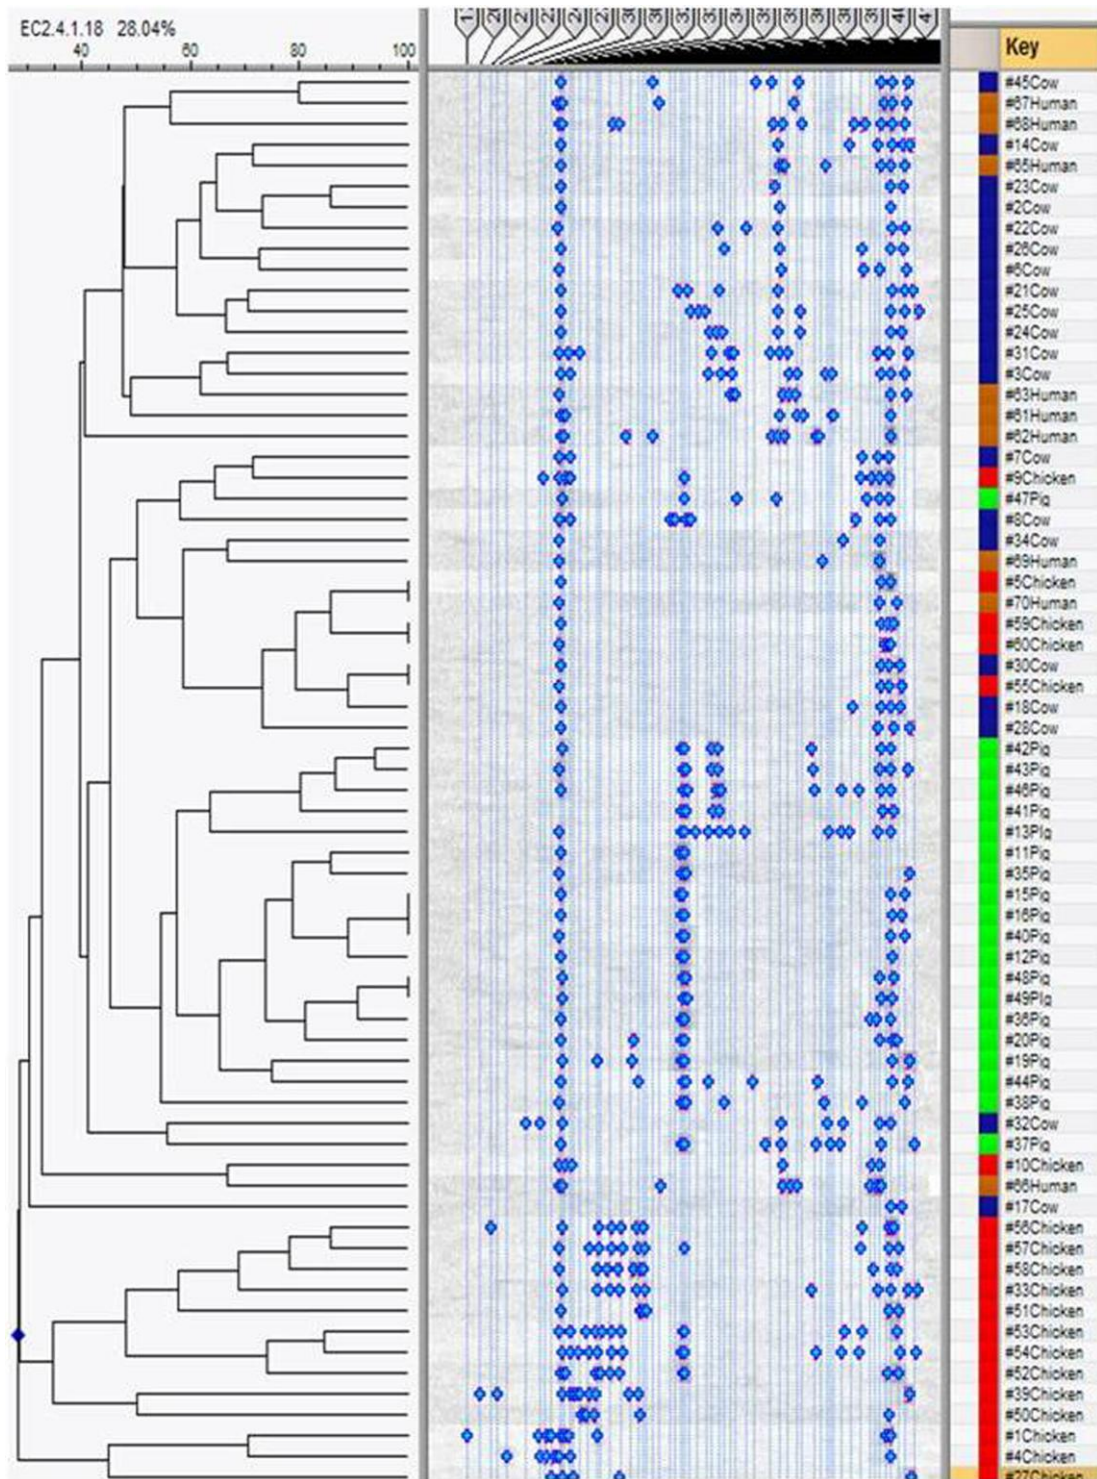

**Supplementary Figure S1. Dendrogram of microbial profiles among 4 hosts analyzed by denaturing gradient gel electrophoresis (DGGE) analysis.**
