# Supplementary material
Source: PubMed Central journal article supplement (PMC3930310)
Supplement: ismej2013167x2.pdf [file ismej2013167x2.pdf]

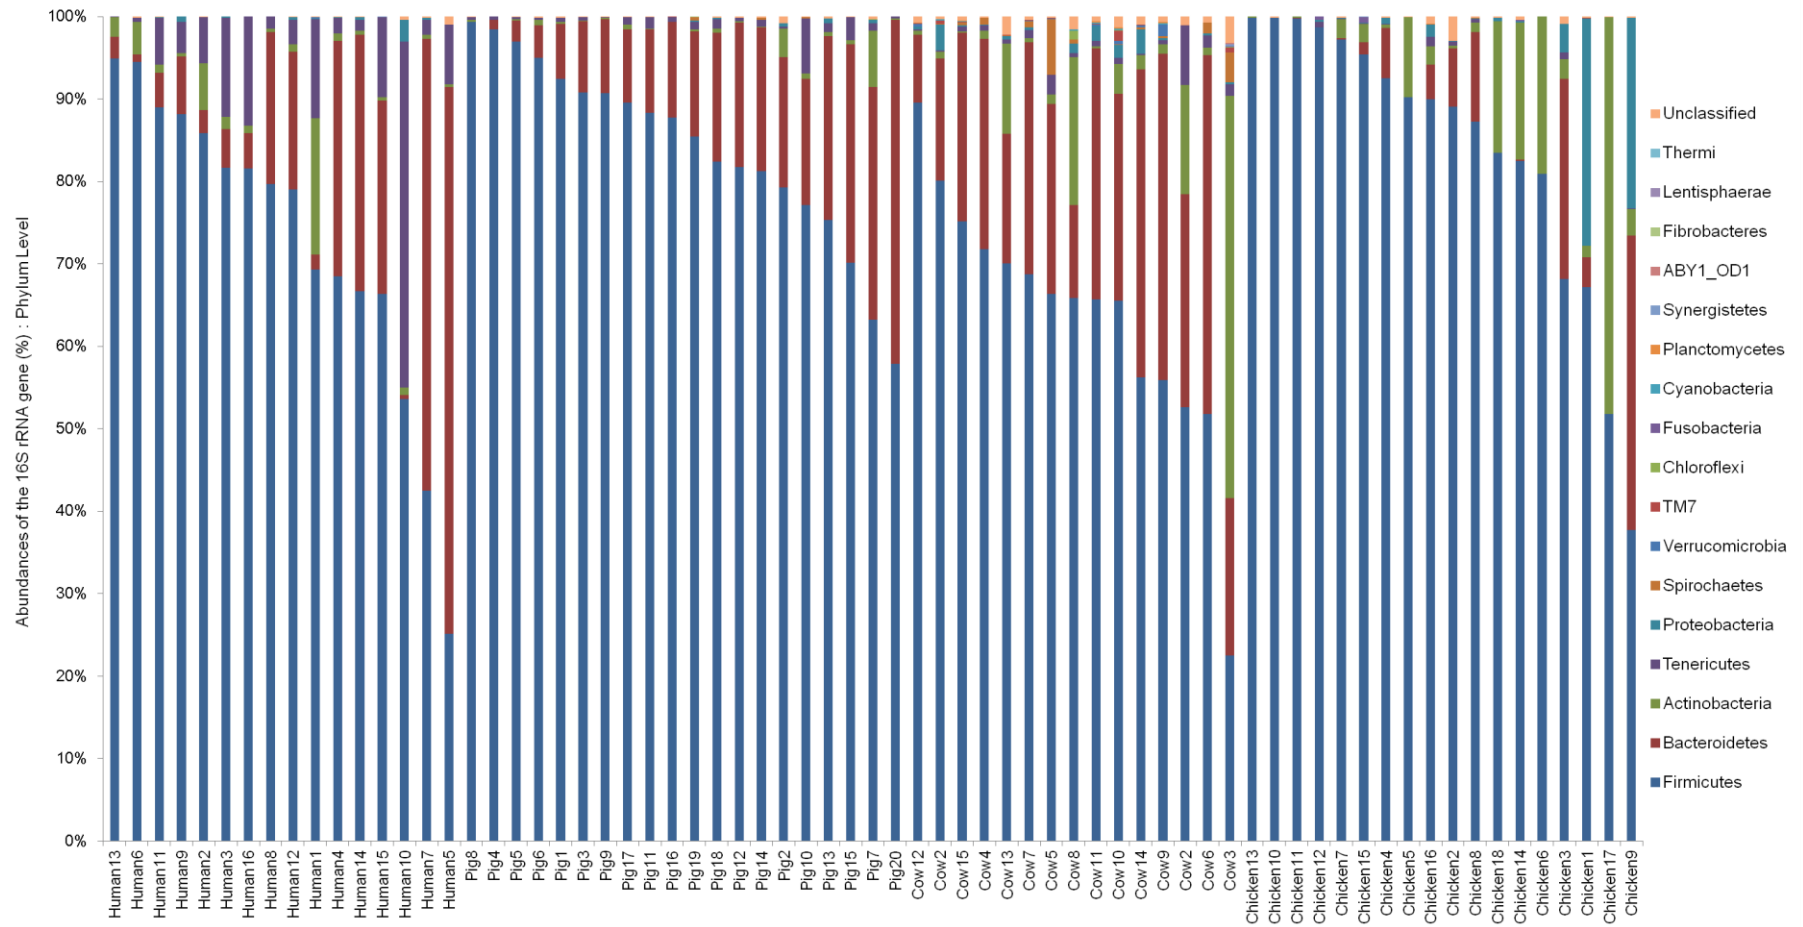

Supplementary Figure S2. The stacked bar graph shows the relative abundance of gut microbiota at the phylum level.
