# Supplementary material
Source: PubMed Central journal article supplement (PMC3930310)
Supplement: ismej2013167x3.pdf [file ismej2013167x3.pdf]

a

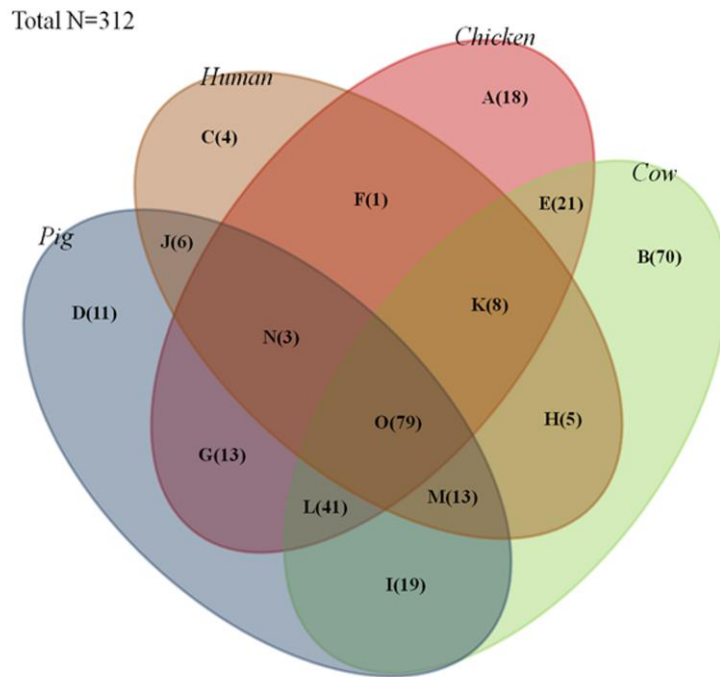

b

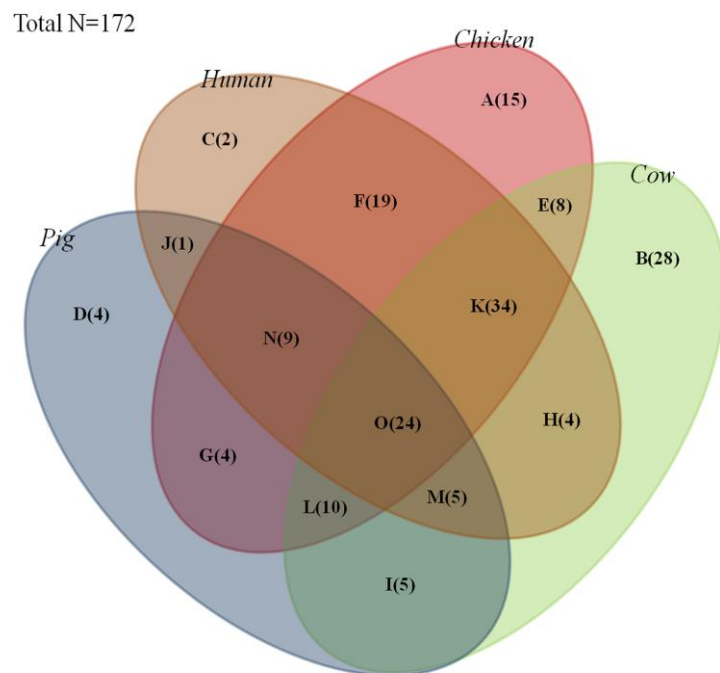

**Supplementary Figure S3. Venn diagram comparing the genus level in (a) 16S rRNA gene, and OGBU level in (b) gBE gene.**

Venn diagrams indicating numbers and percentages of shared and unique across different host. 16S rRNA gene generated from total number of genus level, and gBE gene generated from total number of

OGBU. Each capital in hosts indicates shared and specific groups, and numbers in parenthesis indicate the number of group. There are lists of the genus level and OGBU level in each group in Supplementary Table S2-3.
