# Supplementary material
Source: PubMed Central journal article supplement (PMC3930310)
Supplement: ismej2013167x5.pdf [file ismej2013167x5.pdf]

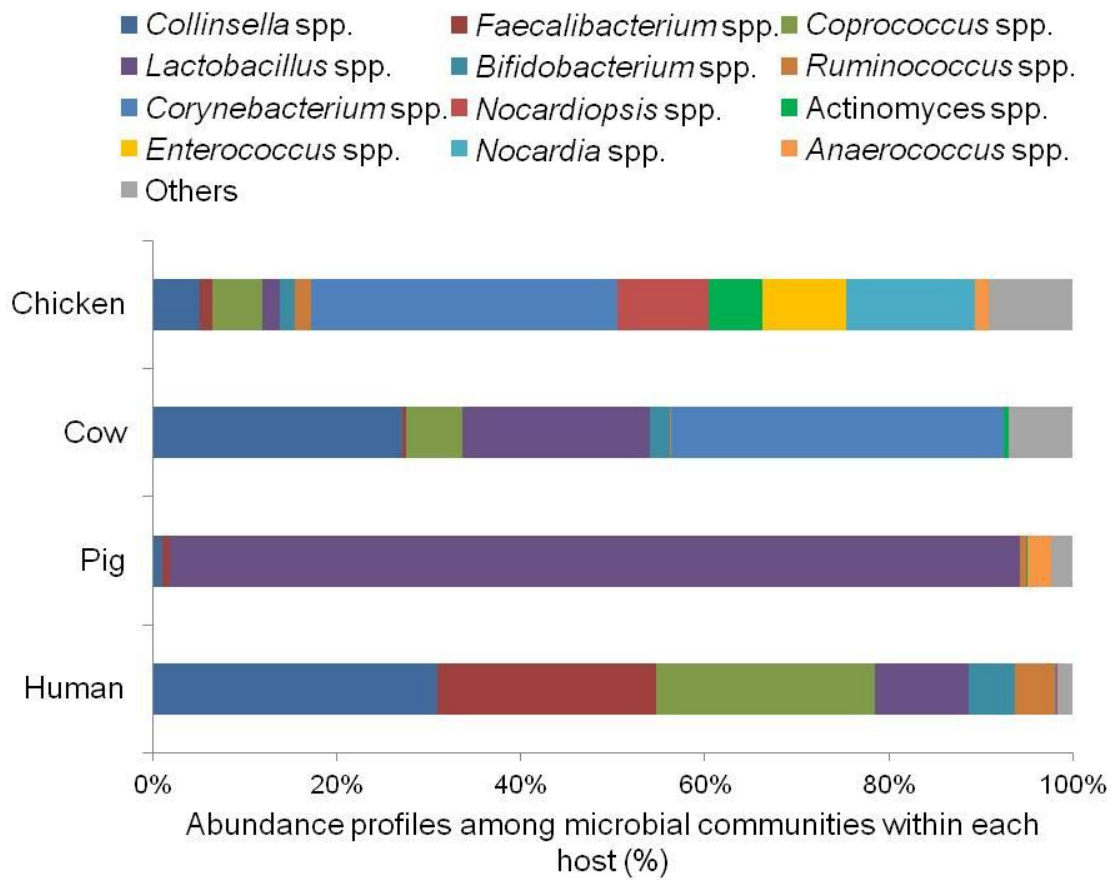

**Supplementary Figure S5. The stacked bar graphs show abundance profiles among microbial communities within each host from gBE genes against HMP microbial reference genomes.**
